# Supplementary material
Source: publisher figshare collection journal article supplement (https://gsajournals.figshare.com/ndownloader/files/12533204)
Supplement: Supplementary file 1 [file 12533204]

## Sheet: 77_Ste_Genes_Table2
Table S4. List of 77 genes for which RNAi depletion caused reproducible and elevated penetrance of sterility in both glp-1(rf) and glp-1(+).
List of 77 genes and their overlap with other large-scale C. elegans RNAi screens that identified “sterile” animals.
Gene Symbol		Maeda et al., 2001	Kamath et al., 2003	Rual et al., 2004	Simmer et al., 2003	Sonnichsen et al., 2005	Fernandez et al., 2005
ant-1.1			y	y
C23G10.8
C53A5.6			y
cbp-1			y
ccdc-55
cct-2			y	y
cdc-5L		y
copd-1			y		y	y
cyn-12
cyn-4
dars-1			y
dic-1				y
dld-1
drd-1
E03H4.8						y
eef-1G			y
egg-3			y		y	y
egl-45			y
emb-5
exos-9			y
F07G11.4
glp-4		y	y	y
grl-4
hsp-1			y			y
K07C5.12
K07C5.4				y
K08D12.3
let-858
mcm-6			y
mdt-6			y
mig-38
mrpl-1
mrps-22
mrps-30				y
mua-3			y
nog-1
npp-3
npp-8
nuo-4				y
pafo-1
par-5
pars-1			y
pas-5			y
pri-1
prp-21				y
prp-38			y
rla-0			y		y
rpa-1
rpc-1				y
rpl-26				y
rpl-3		y	y
rpl-35			y
rps-13			y
rps-16			y
rps-24			y
rps-28			y
rrbs-1			y
ruvb-1
sec-23			y			y
sly-1			y		y	y
spt-16
sptf-3
srh-292
syp-3
T01C3.13
T08D2.8
T26G10.1			y	y
tads-1			y
trd-1			y
unc-45			y
usp-39				y
vha-1			y			y
xpo-2
Y18D10A.16
Y39B6A.33				y
Y57E12AL.6		y	y				y
Y61A9LA.10
LIST OF ALL STUDIES COMPARED:
(1) Maeda, I., Y. Kohara, M. Yamamoto and A. Sugimoto, 2001 Large-scale analysis of gene function in Caenorhabditis elegans by high-throughput RNAi. Curr Biol 11: 171-176
RNAi soaking of L4 animals and then score both in P0 as well as F1 for multiple phenotypes.
(2) Kamath, R. S., A. G. Fraser, Y. Dong, G. Poulin, R. Durbin et al., 2003 Systematic functional analysis of the Caenorhabditis elegans genome using RNAi. Nature 421: 231-237
Whole-animal feeding of L3/L4 worms with RNAi clones targeting 86% of the predicted genes to score for multiple phenotypes in both P0 and F1 progeny.
(3) Simmer, F., C. Moorman, A. M. van der Linden, E. Kuijk, P. V. van den Berghe et al., 2003 Genome-wide RNAi of C. elegans using the hypersensitive rrf-3 strain reveals novel gene functions. PLoS Biol 1: E12
Whole-animal feeding of rrf-3 mutant worms that show hyper-sensitivity to RNAi following by scoring of phenotypes in P0 and F1 progeny
(4) Rual, J. F., J. Ceron, J. Koreth, T. Hao, A. S. Nicot et al., 2004 Toward improving Caenorhabditis elegans phenome mapping with an ORFeome-based RNAi library. Genome Res 14: 2162-2168
Whole-animal feeding of L1 larvae with RNAi clones targeting cDNA to score for 18 phenotypes in P0 and F1 progeny.
(5) Sonnichsen, B., L. B. Koski, A. Walsh, P. Marschall, B. Neumann et al., 2005 Full-genome RNAi profiling of early embryogenesis in Caenorhabditis elegans. Nature 434: 462-469
RNAi clones administered by injection and progeny (F1, F2) scored for lethality, embryonic defects as well as sterility. For comparison to our data set only F1 Ste animals were considered
(6) Fernandez, A. G., K. C. Gunsalus, J. Huang, L. S. Chuang, N. Ying et al., 2005 New genes with roles in the C. elegans embryo revealed using RNAi of ovary-enriched ORFeome clones. Genome Res 15: 250-259
Soaking of L4 worms with RNAi clones targeting ovary-enriched genes and scoring of F1s laid for various phenotypes. For comparison to our data set, only sterility (Ste) phenotye were considered
(7)Lehner, B., J. Tischler and A. G. Fraser, 2006 RNAi screens in Caenorhabditis elegans in a 96-well liquid format and their application to the systematic identification of genetic interactions. Nat Protoc 1: 1617-1620.
Whole-animal RNAi feeding of L1s in sensitized background
With the exception of references (5) and (6), screen lists were filtered for "Ste" phenotype and only those genes whose knockdown caused Ste in the P0 were considered here
